# Supplementary material for: Patterns of Immune Regulation in Rhesus Macaque and Human Families
Source: PubMed Central journal article supplement — Transplant Direct. 2015 Jul 23;1(6):e20. doi: 10.1097/TXD.0000000000000530 (PMC4946471; doi:10.1097/txd.0000000000000530), 2015-07-23
Supplement: txd-1-e20-s001.pdf [file txd-1-e20-s001.pdf]

| Group                        | Identifier                                            | Relationship | Individuals    |        | % DTH inhibition      |                       |                          |
|------------------------------|-------------------------------------------------------|--------------|----------------|--------|-----------------------|-----------------------|--------------------------|
|                              |                                                       |              | ID 1           | ID 2   | PBMC ID 1:<br>Ag ID 2 | PBMC ID 2:<br>Ag ID 1 | Combined %<br>inhibition |
| <b>HLA identical:</b>        |                                                       |              |                |        |                       |                       |                          |
| bidirectional regulators     | N7<br>N11<br>N8                                       | Siblings     | DX76           | GB23   | 50                    | 50                    | 100                      |
|                              |                                                       |              | FA50           | DX30   | 50                    | 50                    | 100                      |
|                              |                                                       |              | DX9G           | H234   | 33                    | 50                    | 83                       |
|                              |                                                       |              | <b>Average</b> |        | 44                    | 50                    | 94                       |
|                              |                                                       |              | Median         |        | 50                    | 50                    | 100                      |
|                              |                                                       |              | Std Dev        |        | 9.8                   | 0.0                   | 9.8                      |
|                              |                                                       |              |                |        |                       |                       |                          |
| non bidirectional regulators | N9<br>N10                                             | Siblings     | DW74           | DX9X   | 0                     | 42                    | 42                       |
|                              |                                                       |              | FE8M           | H190   | 17                    | 0                     | 17                       |
|                              |                                                       |              | <b>Average</b> |        | 9                     | 21                    | 30                       |
|                              |                                                       |              | Median         |        | 8.5                   | 21                    | 29.5                     |
|                              |                                                       |              | Std Dev        |        | 12.0                  | 29.7                  | 17.7                     |
|                              |                                                       |              |                |        |                       |                       |                          |
|                              |                                                       |              |                |        |                       |                       |                          |
| <b>HLA haploidentical:</b>   |                                                       |              |                |        |                       |                       |                          |
| bidirectional regulators     | W22<br>W8<br>N27<br>W6<br>W1<br>N6<br>W3<br>N8<br>W23 | Mother-Child | r03049         | r10053 | 58                    | 50                    | 108                      |
|                              |                                                       |              | r02091         | r09050 | 50                    | 50                    | 100                      |
|                              |                                                       |              | DR40           | H069   | 50                    | 45                    | 95                       |
|                              |                                                       |              | rh2140         | r08043 | 33                    | 58                    | 91                       |
|                              |                                                       |              | rh2136         | r05049 | 33                    | 50                    | 83                       |
|                              |                                                       |              | CP42           | GB25   | 33                    | 50                    | 83                       |
|                              |                                                       |              | r04145         | r09070 | 25                    | 57                    | 82                       |
|                              |                                                       |              | CC53           | H644   | 38                    | 40                    | 78                       |
|                              |                                                       |              | r04115         | r10024 | 30                    | 43                    | 73                       |
|                              |                                                       |              | <b>Average</b> |        | 39                    | 49                    | 88                       |
|                              |                                                       |              | Median         |        | 33                    | 50                    | 83                       |
|                              |                                                       |              | Std Dev        |        | 11.1                  | 5.9                   | 11.3                     |
|                              |                                                       |              |                |        |                       |                       |                          |
|                              |                                                       |              |                |        |                       |                       |                          |

| Group                                                      | Identifier | Relationship | Individuals |        | % DTH inhibition |            |                       |    |
|------------------------------------------------------------|------------|--------------|-------------|--------|------------------|------------|-----------------------|----|
|                                                            |            |              | ID 1        | ID 2   | PBMC ID 1:       | PBMC ID 2: | Combined % inhibition |    |
|                                                            |            |              |             |        | Ag ID 2          | Ag ID 1    |                       |    |
| <b>HLA haploidentical:</b><br>non-bidirectional regulators | W19        | Mother-Child | r04092      | r09059 | 20               | 100        | 120                   |    |
|                                                            | W5         |              | rh1982      | r05076 | 16               | 50         | 66                    |    |
|                                                            | W8         |              | rhau72      | r02091 | 16               | 50         | 66                    |    |
|                                                            | W13        |              | BD03        | BH49   | 25               | 40         | 65                    |    |
|                                                            | W17        |              | r02062      | r08045 | 40               | 25         | 65                    |    |
|                                                            | W14        |              | BD89        | BH41   | 0                | 60         | 60                    |    |
|                                                            | W7         |              | rh1994      | r05036 | 0                | 57         | 57                    |    |
|                                                            | N8         |              | CC53        | DX9G   | 13               | 43         | 56                    |    |
|                                                            | N19        |              | DV2W        | H293   | 27               | 25         | 52                    |    |
|                                                            | W5         |              | rh1982      | r09075 | 0                | 50         | 50                    |    |
|                                                            | W15        |              | AZ56        | BH82   | 0                | 50         | 50                    |    |
|                                                            | W18        |              | rh2015      | r09033 | 0                | 50         | 50                    |    |
|                                                            | W21        |              | r04124      | r11019 | 50               | 0          | 50                    |    |
|                                                            | N24        |              | CH62        | H802   | 37               | 11         | 48                    |    |
|                                                            | W12        |              | BC23        | BF86   | 14               | 30         | 44                    |    |
|                                                            | W19        |              | r04092      | r11011 | 40               | 0          | 40                    |    |
|                                                            | W20        |              | r04103      | r10067 | 0                | 33         | 33                    |    |
|                                                            | W17        |              | R02062      | R11035 | 8                | 25         | 33                    |    |
|                                                            | N27        |              | DR40        | H738   | 10               | 22         | 32                    |    |
|                                                            | W23        |              | r04115      | r11022 | 30               | 0          | 30                    |    |
|                                                            | N5         |              | DN7A        | DX6C   | 0                | 29         | 29                    |    |
|                                                            | W15        |              | AY14        | BH25   | 0                | 25         | 25                    |    |
|                                                            | N26        |              | AX70        | GB51   | 0                | 25         | 25                    |    |
|                                                            | N26        |              | AX70        | H213   | 0                | 22         | 22                    |    |
|                                                            | N4         |              | DN20        | DX6A   | 0                | 20         | 20                    |    |
|                                                            | N10        |              | CW85        | DX5P   | 0                | 17         | 17                    |    |
|                                                            | N24        |              | CH62        | H294   | 0                | 12         | 12                    |    |
|                                                            | N23        |              | CD5H        | H04J   | 11               | 0          | 11                    |    |
|                                                            | N21        |              | DM5E        | H643   | 0                | 10         | 10                    |    |
|                                                            | N17        |              | CX6V        | FC6D   | 0                | 6          | 6                     |    |
|                                                            | N11        |              | CX1H        | FA50   | 0                | 4          | 4                     |    |
|                                                            | W11        |              | r02024      | r09018 | 0                | 0          | 0                     |    |
|                                                            | N18        |              | CW8C        | rh2420 | 0                | 0          | 0                     |    |
|                                                            | N19        |              | CM99        | DV2W   | 0                | 0          | 0                     |    |
|                                                            | N19        |              | CM99        | H291   | 0                | 0          | 0                     |    |
|                                                            | N25        |              | CD5E        | GB90   | 0                | 0          | 0                     |    |
|                                                            | N25        |              | CD5E        | H703   | 0                | 0          | 0                     |    |
|                                                            | N22        |              | CX8V        | H652   | 0                | 0          | 0                     |    |
|                                                            |            |              |             |        | <b>Average</b>   | 9          | 23                    | 33 |
|                                                            |            |              |             |        | Median           | 0          | 22                    | 31 |
|                                                            |            |              | Std Dev     | 14.3   | 23.2             | 27.0       |                       |    |

| Group                                                      | Identifier | Relationship    | Individuals |        | % DTH inhibition |                |                       |      |      |
|------------------------------------------------------------|------------|-----------------|-------------|--------|------------------|----------------|-----------------------|------|------|
|                                                            |            |                 | ID 1        | ID 2   | PBMC ID 1:       | PBMC ID 2:     | Combined % inhibition |      |      |
|                                                            |            |                 |             |        | Ag ID 2          | Ag ID 1        |                       |      |      |
| <b>HLA haploidentical:</b><br>non-bidirectional regulators | N8         | Sibling-Sibling | DX9G        | H644   | 50               | 20             | 70                    |      |      |
|                                                            | W23        |                 | r10024      | r11022 | 43               | 20             | 63                    |      |      |
|                                                            | N27        |                 | H069        | H738   | 55               | 0              | 55                    |      |      |
|                                                            | W6         |                 | r08043      | r10030 | 17               | 33             | 50                    |      |      |
|                                                            | W5         |                 | r05076      | r09075 | 33               | 16             | 49                    |      |      |
|                                                            | N8         |                 | FG4V        | DX9G   | 12               | 33             | 45                    |      |      |
|                                                            | N15        |                 | FE5R        | GB2X   | 20               | 20             | 40                    |      |      |
|                                                            | N10        |                 | FE8M        | DX5P   | 33               | 0              | 33                    |      |      |
|                                                            | N24        |                 | H294        | H802   | 12               | 11             | 23                    |      |      |
|                                                            | N18        |                 | FE5N        | RH2477 | 0                | 20             | 20                    |      |      |
|                                                            | W9         |                 | r04012      | r05073 | 20               | 0              | 20                    |      |      |
|                                                            | N18        |                 | FE5N        | H763   | 0                | 15             | 15                    |      |      |
|                                                            | N2         |                 | FA7C        | DX7A   | 10               | 0              | 10                    |      |      |
|                                                            | N1         |                 | FC24        | DX6P   | 5                | 0              | 5                     |      |      |
|                                                            | N3         |                 | FG5A        | GB6G   | 0                | 0              | 0                     |      |      |
|                                                            | N8         |                 | FG4V        | H234   | 0                | 0              | 0                     |      |      |
|                                                            | N10        |                 | DX5P        | H190   | 0                | 0              | 0                     |      |      |
|                                                            | N11        |                 | FA50        | H251   | 0                | 0              | 0                     |      |      |
|                                                            | N11        |                 | DX30        | H251   | 0                | 0              | 0                     |      |      |
|                                                            | N12        |                 | DX5K        | H195   | 0                | 0              | 0                     |      |      |
|                                                            | N13        |                 | DX5H        | H188   | 0                | 0              | 0                     |      |      |
|                                                            | N14        |                 | DX5G        | H189   | 0                | 0              | 0                     |      |      |
|                                                            | N15        |                 | GB2X        | H072   | 0                | 0              | 0                     |      |      |
|                                                            | N16        |                 | FE5M        | GB2W   | 0                | 0              | 0                     |      |      |
|                                                            | N16        |                 | GB2W        | H071   | 0                | 0              | 0                     |      |      |
|                                                            | N25        |                 | GB90        | H703   | 0                | 0              | 0                     |      |      |
|                                                            | N26        |                 | GB51        | H213   | 0                | 0              | 0                     |      |      |
|                                                            |            |                 |             |        |                  | <b>Average</b> | 11                    | 7    | 18   |
|                                                            |            |                 |             |        |                  | Median         | 0                     | 0    | 5    |
|                                                            |            |                 |             |        |                  | Std Dev        | 17.0                  | 10.9 | 23.2 |
