# Supplementary material for: Patterns of Immune Regulation in Rhesus Macaque and Human Families
Source: PubMed Central journal article supplement — Transplant Direct. 2015 Jul 23;1(6):e20. doi: 10.1097/TXD.0000000000000530 (PMC4946471; doi:10.1097/txd.0000000000000530), 2015-07-23
Supplement: txd-1-e20-s002.pdf [file txd-1-e20-s002.pdf]

| Group                        | Identifier                                                         | Relationship    | Individuals    |      | % DTH inhibition      |                       |                          |
|------------------------------|--------------------------------------------------------------------|-----------------|----------------|------|-----------------------|-----------------------|--------------------------|
|                              |                                                                    |                 | ID 1           | ID 2 | PBMC ID 1:<br>Ag ID 2 | PBMC ID 2:<br>Ag ID 1 | Combined %<br>inhibition |
| <b>HLA identical:</b>        |                                                                    |                 |                |      |                       |                       |                          |
| bidirectional regulators     | FTx-12<br>FTx-02                                                   | Siblings        | B2 D           | S3   | 67                    | 63                    | 130                      |
|                              |                                                                    |                 | S2 D           | B4 R | 50                    | 50                    | 100                      |
|                              |                                                                    |                 | <b>Average</b> |      | 58.5                  | 56.5                  | <b>115</b>               |
|                              |                                                                    |                 | Median         |      | 58.5                  | 56.5                  | 115                      |
|                              |                                                                    |                 | Std Dev        |      | 12                    | 9.2                   | 21.2                     |
| non bidirectional regulators | FTx-11<br>FAM-02                                                   | Siblings        | S5             | S1   | 25                    | 25                    | 50                       |
|                              |                                                                    |                 | B1             | B5   | 0                     | 0                     | 0                        |
|                              |                                                                    |                 | <b>Average</b> |      | 12.5                  | 12.5                  | <b>25</b>                |
|                              |                                                                    |                 | Median         |      | 12.5                  | 12.5                  | 25                       |
|                              |                                                                    |                 | Std Dev        |      | 17.7                  | 17.7                  | 35.4                     |
| <b>HLA haploidentical:</b>   |                                                                    |                 |                |      |                       |                       |                          |
| bidirectional regulators     | FTx-06<br>FTx-02<br>FTx-27<br>FTx-27<br>FTx-02<br>FTx-08<br>FTx-20 | Mother-Child    | M R            | S2   | 86                    | 43                    | 129                      |
|                              |                                                                    |                 | M              | S2 D | 50                    | 75                    | 125                      |
|                              |                                                                    |                 | M              | B1 R | 30                    | 60                    | 90                       |
|                              |                                                                    |                 | M              | B2 D | 40                    | 57                    | 97                       |
|                              |                                                                    |                 | M              | B3   | 50                    | 50                    | 100                      |
|                              |                                                                    |                 | M R            | B2 D | 25                    | 50                    | 75                       |
|                              |                                                                    |                 | M R            | S2 D | 25                    | 50                    | 75                       |
|                              |                                                                    |                 | <b>Average</b> |      | 43.7                  | 55                    | <b>98.7</b>              |
|                              |                                                                    |                 | Median         |      | 40                    | 50                    | 97                       |
|                              | Std Dev                                                            |                 | 21.5           | 10.4 | 21.7                  |                       |                          |
|                              | FTx-05                                                             | Sibling-Sibling | B3             | S1 D | 40                    | 31                    | 71                       |

| Group                                                      | Identifier | Relationship | Individuals  |                | % DTH inhibition      |                       |                          |             |    |
|------------------------------------------------------------|------------|--------------|--------------|----------------|-----------------------|-----------------------|--------------------------|-------------|----|
|                                                            |            |              | ID 1         | ID 2           | PBMC ID 1:<br>Ag ID 2 | PBMC ID 2:<br>Ag ID 1 | Combined %<br>inhibition |             |    |
| <b>HLA haploidentical:</b><br>non-bidirectional regulators | FTx-05     | Mother-Child | M            | B3             | 0                     | 80                    | 80                       |             |    |
|                                                            | FTx-05     |              | M            | S1 D           | 0                     | 50                    | 50                       |             |    |
|                                                            | FTx-06     |              | M R          | S3 D           | 7                     | 50                    | 57                       |             |    |
|                                                            | FTx-17     |              | M R          | B2 D           | 0                     | 50                    | 50                       |             |    |
|                                                            | FTx-21     |              | M            | B1 R           | 23                    | 30                    | 53                       |             |    |
|                                                            | FTx-18     |              | M            | B4 D           | 27                    | 23                    | 50                       |             |    |
|                                                            | FAM-01     |              | M            | B1             | 25                    | 18                    | 43                       |             |    |
|                                                            | FTx-22     |              | M R          | B2 D           | 14                    | 30                    | 44                       |             |    |
|                                                            | FTx-02     |              | M            | B4 R           | 0                     | 30                    | 30                       |             |    |
|                                                            | FTx-25     |              | M D          | B1 R           | 0                     | 25                    | 25                       |             |    |
|                                                            | FTx-15     |              | M R          | S D            | 22                    | 0                     | 22                       |             |    |
|                                                            | FTx-14     |              | M R          | S 2            | 17                    | 0                     | 17                       |             |    |
|                                                            | FTx-14     |              | M R          | S1 D           | 0                     | 30                    | 30                       |             |    |
|                                                            | FTx-19     |              | M            | B D            | 0                     | 29                    | 29                       |             |    |
|                                                            | FTx-16     |              | M D          | B1 R           | 0                     | 0                     | 0                        |             |    |
|                                                            |            |              |              |                | <b>Average</b>        | 9                     | 29.7                     | <b>38.7</b> |    |
|                                                            |            |              |              | Median         | 0                     | 30                    | 43                       |             |    |
|                                                            |            |              |              | Std Dev        | 11                    | 21.7                  | 19.6                     |             |    |
|                                                            |            | FTx 04       | Father-Child | F R            | S2                    | 33                    | 29                       | 62          |    |
|                                                            |            | FTx-21       |              | F D-B1 R       | F D                   | B1 R                  | 25                       | 20          | 45 |
|                                                            |            | FTx-04       |              | F R-S4 D       | F R                   | S4 D                  | 17                       | 29          | 46 |
|                                                            |            | FTx-18       |              | F R-B4 D       | F R                   | B4 D                  | 14                       | 8           | 22 |
|                                                            |            | FTx-10       |              | F R-B2 D       | F R                   | B2 D                  | 25                       | 0           | 25 |
|                                                            |            | FTx-19       |              | F R-B D        | F R                   | B D                   | 0                        | 14          | 14 |
|                                                            |            | FTx-13       |              | F R-B3 D       | F R                   | B3 D                  | 0                        | 10          | 10 |
|                                                            |            | FTx-12       |              | F R-B2 D       | F R                   | B2 D                  | 0                        | 0           | 0  |
|                                                            |            |              |              | <b>Average</b> | 14.3                  | 13.8                  | <b>28</b>                |             |    |
|                                                            |            |              | Median       | 15.5           | 12                    | 23.5                  |                          |             |    |
|                                                            |            |              | Std Dev      | 13.1           | 11.5                  | 21.1                  |                          |             |    |

| Group                                                      | Identifier | Relationship    | Individuals    |      | % DTH inhibition      |                       |                          |
|------------------------------------------------------------|------------|-----------------|----------------|------|-----------------------|-----------------------|--------------------------|
|                                                            |            |                 | ID 1           | ID 2 | PBMC ID 1:<br>Ag ID 2 | PBMC ID 2:<br>Ag ID 1 | Combined %<br>inhibition |
| <b>HLA haploidentical:</b><br>non-bidirectional regulators | FAM-02     | Sibling-Sibling | B1             | S2   | 0                     | 50                    | 50                       |
|                                                            | FTx-11     |                 | B8 D           | S2 R | 50                    | 17                    | 67                       |
|                                                            | FTx-11     |                 | S5             | S6   | 50                    | 12                    | 62                       |
|                                                            | FTx-03     |                 | S D            | S R  | 33                    | 17                    | 50                       |
|                                                            | FTx-11     |                 | S6             | S1   | 25                    | 25                    | 50                       |
|                                                            | FTx 04     |                 | S2             | S4 D | 14                    | 14                    | 28                       |
|                                                            | FAM-02     |                 | S2             | B5   | 0                     | 25                    | 25                       |
|                                                            | FTx-14     |                 | S1 D           | S2   | 0                     | 11                    | 11                       |
|                                                            | FTx-27     |                 | B2 D           | B1 R | 36                    | 0                     | 36                       |
|                                                            | FAM-02     |                 | B5             | B3   | 21                    | 0                     | 21                       |
|                                                            | FTx-09     |                 | S2 D           | S1 R | 17                    | 0                     | 17                       |
|                                                            | FAM-02     |                 | B5             | S6   | 0                     | 0                     | 0                        |
|                                                            |            |                 |                |      | <b>Average</b>        | 20.5                  | 14.3                     |
|                                                            |            |                 | Median         | 19   | 13                    | 32                    |                          |
|                                                            |            |                 | Std Dev        | 18.8 | 14.6                  | 21.1                  |                          |
| <b>HLA 2 haplomismatched:</b><br>Sibling-Sibling           | FTx-06     | Sibling-Sibling | S3 D           | S2   | 75                    | 29                    | 104                      |
| <b>HLA mismatched</b><br><b>Living Unrelated Donor</b>     | FTx-18     | Wife-Husband    | M              | F    | 0                     | 7                     | 7                        |
|                                                            | FTx-19     |                 | M              | F    | 0                     | 0                     | 0                        |
|                                                            | FTx-21     |                 | M              | F    | 15                    | 0                     | 15                       |
|                                                            |            |                 | <b>Average</b> | 5    | 2.3                   | <b>7.3</b>            |                          |
|                                                            |            |                 | Median         | 0    | 0                     | 7                     |                          |
|                                                            |            |                 | Std Dev        | 8.7  | 4                     | 7.5                   |                          |
